# Supplementary material for: Distribution Model Reveals Rapid Decline in Habitat Extent for Endangered Hispid Hare: Implications for Wildlife Management and Conservation Planning in Future Climate Change Scenarios
Source: MDPI journal article supplement (doi:10.3390/biology13030198), 2024-03-20
Supplement: s1 [file s1]

## Supplementary Materials

| Covariates/ aspect | aspect | bio_1  | bio_10 | bio_11 | bio_12 | bio_13 | bio_14 | bio_15 | bio_16 | bio_17 | bio_18 | bio_19 | bio_2  | bio_3  | bio_4  | bio_5  | bio_6  | bio_7  | bio_8  | bio_9  | elevation | euc_20 | euc_50 | euc_90 | ndvi   | slope  |
|--------------------|--------|--------|--------|--------|--------|--------|--------|--------|--------|--------|--------|--------|--------|--------|--------|--------|--------|--------|--------|--------|-----------|--------|--------|--------|--------|--------|
| aspect             | 1.000  | -0.025 | -0.029 | -0.022 | 0.022  | 0.015  | 0.045  | -0.030 | 0.015  | 0.031  | 0.036  | 0.023  | -0.006 | 0.033  | -0.005 | -0.033 | -0.021 | -0.018 | -0.024 | -0.027 | 0.023     | 0.008  | 0.014  | 0.013  | 0.007  | 0.116  |
| bio_1              | -0.025 | 1.000  | 0.991  | 0.996  | 0.636  | 0.673  | 0.046  | 0.436  | 0.681  | 0.272  | 0.319  | 0.007  | -0.457 | 0.289  | -0.761 | 0.966  | 0.991  | -0.514 | 0.967  | 0.952  | -0.993    | -0.335 | -0.643 | -0.488 | 0.375  | -0.058 |
| bio_10             | -0.029 | 0.991  | 1.000  | 0.977  | 0.568  | 0.631  | -0.003 | 0.508  | 0.633  | 0.221  | 0.240  | -0.022 | -0.371 | 0.197  | -0.672 | 0.989  | 0.968  | -0.401 | 0.964  | 0.952  | -0.981    | -0.306 | -0.610 | -0.469 | 0.361  | -0.059 |
| bio_11             | -0.022 | 0.996  | 0.977  | 1.000  | 0.666  | 0.690  | 0.073  | 0.392  | 0.701  | 0.294  | 0.350  | 0.021  | -0.502 | 0.340  | -0.815 | 0.946  | 0.998  | -0.575 | 0.955  | 0.944  | -0.989    | -0.359 | -0.655 | -0.496 | 0.375  | -0.053 |
| bio_12             | 0.022  | 0.636  | 0.568  | 0.666  | 1.000  | 0.957  | 0.451  | 0.087  | 0.974  | 0.542  | 0.876  | 0.219  | -0.751 | 0.408  | -0.756 | 0.470  | 0.690  | -0.798 | 0.629  | 0.553  | -0.669    | -0.237 | -0.456 | -0.319 | 0.286  | -0.023 |
| bio_13             | 0.015  | 0.673  | 0.631  | 0.690  | 0.957  | 1.000  | 0.354  | 0.299  | 0.993  | 0.470  | 0.791  | 0.182  | -0.646 | 0.297  | -0.675 | 0.557  | 0.710  | -0.663 | 0.665  | 0.607  | -0.697    | -0.260 | -0.471 | -0.344 | 0.275  | -0.024 |
| bio_14             | 0.045  | 0.046  | -0.003 | 0.073  | 0.451  | 0.354  | 1.000  | -0.307 | 0.367  | 0.856  | 0.529  | 0.689  | -0.468 | 0.141  | -0.258 | -0.078 | 0.108  | -0.455 | 0.057  | 0.022  | -0.081    | -0.160 | -0.123 | -0.032 | -0.012 | 0.024  |
| bio_15             | -0.030 | 0.436  | 0.508  | 0.392  | 0.087  | 0.299  | -0.307 | 1.000  | 0.263  | -0.222 | -0.122 | -0.295 | 0.105  | -0.320 | 0.007  | 0.558  | 0.373  | 0.232  | 0.490  | 0.411  | -0.423    | -0.104 | -0.319 | -0.263 | 0.138  | -0.024 |
| bio_16             | 0.015  | 0.681  | 0.633  | 0.701  | 0.974  | 0.993  | 0.367  | 0.263  | 1.000  | 0.476  | 0.805  | 0.171  | -0.680 | 0.321  | -0.706 | 0.552  | 0.721  | -0.702 | 0.673  | 0.608  | -0.706    | -0.256 | -0.476 | -0.346 | 0.289  | -0.025 |
| bio_17             | 0.031  | 0.272  | 0.221  | 0.294  | 0.542  | 0.470  | 0.856  | -0.222 | 0.476  | 1.000  | 0.524  | 0.819  | -0.529 | 0.221  | -0.405 | 0.152  | 0.331  | -0.544 | 0.261  | 0.254  | -0.300    | -0.219 | -0.259 | -0.134 | 0.027  | -0.001 |
| bio_18             | 0.036  | 0.319  | 0.240  | 0.350  | 0.876  | 0.791  | 0.529  | -0.122 | 0.805  | 0.524  | 1.000  | 0.231  | -0.664 | 0.421  | -0.539 | 0.125  | 0.378  | -0.728 | 0.349  | 0.225  | -0.373    | -0.103 | -0.263 | -0.163 | 0.206  | -0.007 |
| bio_19             | 0.023  | 0.007  | -0.022 | 0.021  | 0.219  | 0.182  | 0.689  | -0.295 | 0.171  | 0.819  | 0.231  | 1.000  | -0.247 | 0.086  | -0.124 | -0.050 | 0.055  | -0.255 | -0.053 | 0.115  | -0.018    | -0.144 | -0.075 | 0.000  | -0.123 | 0.012  |
| bio_2              | -0.006 | -0.457 | -0.371 | -0.502 | -0.751 | -0.646 | -0.468 | 0.105  | -0.680 | -0.529 | -0.664 | -0.247 | 1.000  | -0.148 | 0.722  | -0.256 | -0.549 | 0.895  | -0.455 | -0.363 | 0.496     | 0.244  | 0.381  | 0.281  | -0.155 | 0.047  |
| bio_3              | 0.033  | 0.289  | 0.197  | 0.340  | 0.408  | 0.297  | 0.141  | -0.320 | 0.321  | 0.221  | 0.421  | 0.086  | -0.148 | 1.000  | -0.634 | 0.142  | 0.332  | -0.568 | 0.215  | 0.265  | -0.279    | -0.197 | -0.291 | -0.161 | 0.227  | 0.035  |
| bio_4              | -0.005 | -0.761 | -0.672 | -0.815 | -0.756 | -0.675 | -0.258 | 0.007  | -0.706 | -0.405 | -0.539 | -0.124 | 0.722  | -0.634 | 1.000  | -0.596 | -0.828 | 0.891  | -0.688 | -0.691 | 0.759     | -0.428 | -0.616 | -0.448 | -0.315 | 0.020  |
| bio_5              | -0.033 | 0.966  | 0.989  | 0.946  | 0.470  | 0.557  | -0.078 | 0.558  | 0.552  | 0.152  | 0.125  | -0.050 | -0.256 | 0.142  | -0.596 | 1.000  | 0.932  | -0.282 | 0.935  | 0.942  | -0.948    | -0.294 | -0.579 | -0.449 | 0.341  | -0.053 |
| bio_6              | -0.021 | 0.991  | 0.968  | 0.998  | 0.690  | 0.710  | 0.108  | 0.373  | 0.721  | 0.331  | 0.378  | 0.055  | -0.549 | 0.332  | -0.828 | 0.932  | 1.000  | -0.611 | 0.951  | 0.939  | -0.986    | -0.362 | -0.650 | -0.491 | 0.367  | -0.053 |
| bio_7              | -0.018 | -0.514 | -0.401 | -0.575 | -0.798 | -0.663 | -0.455 | 0.232  | -0.702 | -0.544 | -0.728 | -0.255 | 0.895  | -0.568 | 0.891  | -0.282 | -0.611 | 1.000  | -0.475 | -0.427 | 0.541     | 0.318  | 0.456  | 0.320  | -0.226 | 0.024  |
| bio_8              | -0.024 | 0.967  | 0.964  | 0.955  | 0.629  | 0.665  | 0.057  | 0.490  | 0.673  | 0.261  | 0.349  | -0.053 | -0.455 | 0.215  | -0.688 | 0.935  | 0.951  | -0.475 | 1.000  | 0.889  | -0.972    | -0.289 | -0.598 | -0.456 | 0.379  | -0.061 |
| bio_9              | -0.027 | 0.952  | 0.952  | 0.944  | 0.553  | 0.607  | 0.022  | 0.411  | 0.608  | 0.254  | 0.225  | 0.115  | -0.363 | 0.265  | -0.691 | 0.942  | 0.939  | -0.427 | 0.889  | 1.000  | -0.938    | -0.341 | -0.609 | -0.451 | 0.323  | -0.056 |
| elevation          | 0.023  | -0.993 | -0.981 | -0.989 | -0.669 | -0.697 | -0.081 | -0.423 | -0.706 | -0.300 | -0.373 | -0.018 | 0.496  | -0.279 | 0.759  | -0.948 | -0.986 | 0.541  | -0.972 | -0.938 | 1.000     | 0.327  | 0.646  | 0.483  | -0.384 | 0.061  |
| euc_20             | 0.008  | -0.335 | -0.306 | -0.359 | -0.237 | -0.260 | -0.160 | -0.104 | -0.256 | -0.219 | -0.103 | -0.144 | 0.244  | -0.197 | 0.428  | -0.294 | -0.362 | 0.318  | -0.289 | -0.341 | 0.327     | 1.000  | 0.557  | 0.616  | -0.138 | -0.001 |
| euc_50             | 0.014  | -0.643 | -0.610 | -0.655 | -0.456 | -0.471 | -0.123 | -0.319 | -0.476 | -0.259 | -0.263 | -0.075 | 0.381  | -0.291 | 0.616  | -0.579 | -0.650 | 0.456  | -0.598 | -0.609 | 0.646     | 0.557  | 1.000  | 0.647  | -0.279 | 0.019  |
| euc_90             | 0.013  | -0.488 | -0.469 | -0.496 | -0.319 | -0.344 | -0.032 | -0.263 | -0.346 | -0.134 | -0.163 | 0.000  | 0.281  | -0.161 | 0.448  | -0.449 | -0.491 | 0.320  | -0.456 | -0.451 | 0.483     | 0.616  | 0.647  | 1.000  | -0.198 | 0.024  |
| ndvi               | 0.007  | 0.375  | 0.361  | 0.375  | 0.286  | 0.275  | -0.012 | 0.138  | 0.289  | 0.027  | 0.206  | -0.123 | -0.155 | 0.227  | -0.315 | 0.341  | 0.367  | -0.226 | 0.379  | 0.323  | -0.384    | -0.138 | -0.279 | -0.198 | 1.000  | 0.003  |
| slope              | 0.116  | -0.058 | -0.059 | -0.053 | -0.023 | -0.024 | 0.024  | -0.024 | -0.025 | -0.001 | -0.007 | 0.012  | 0.047  | 0.035  | 0.020  | -0.053 | -0.053 | 0.024  | -0.061 | -0.056 | 0.061     | -0.001 | 0.019  | 0.024  | 0.003  | 1.000  |

**Figure S1.** Correlation metrics of covariates represents the spatial correlation among the predictors assessed using SDM Toolbox v2.4

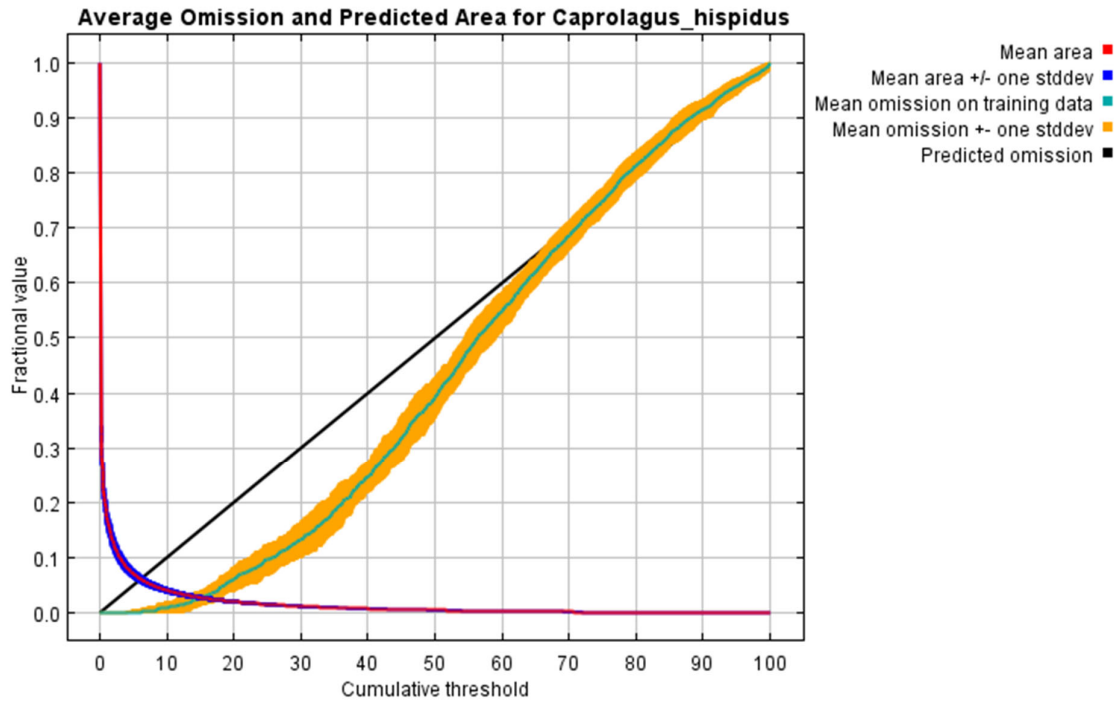

**Figure S2.** The training omission rate and predicted area as a function of the cumulative threshold, averaged over the 20 replicate runs.

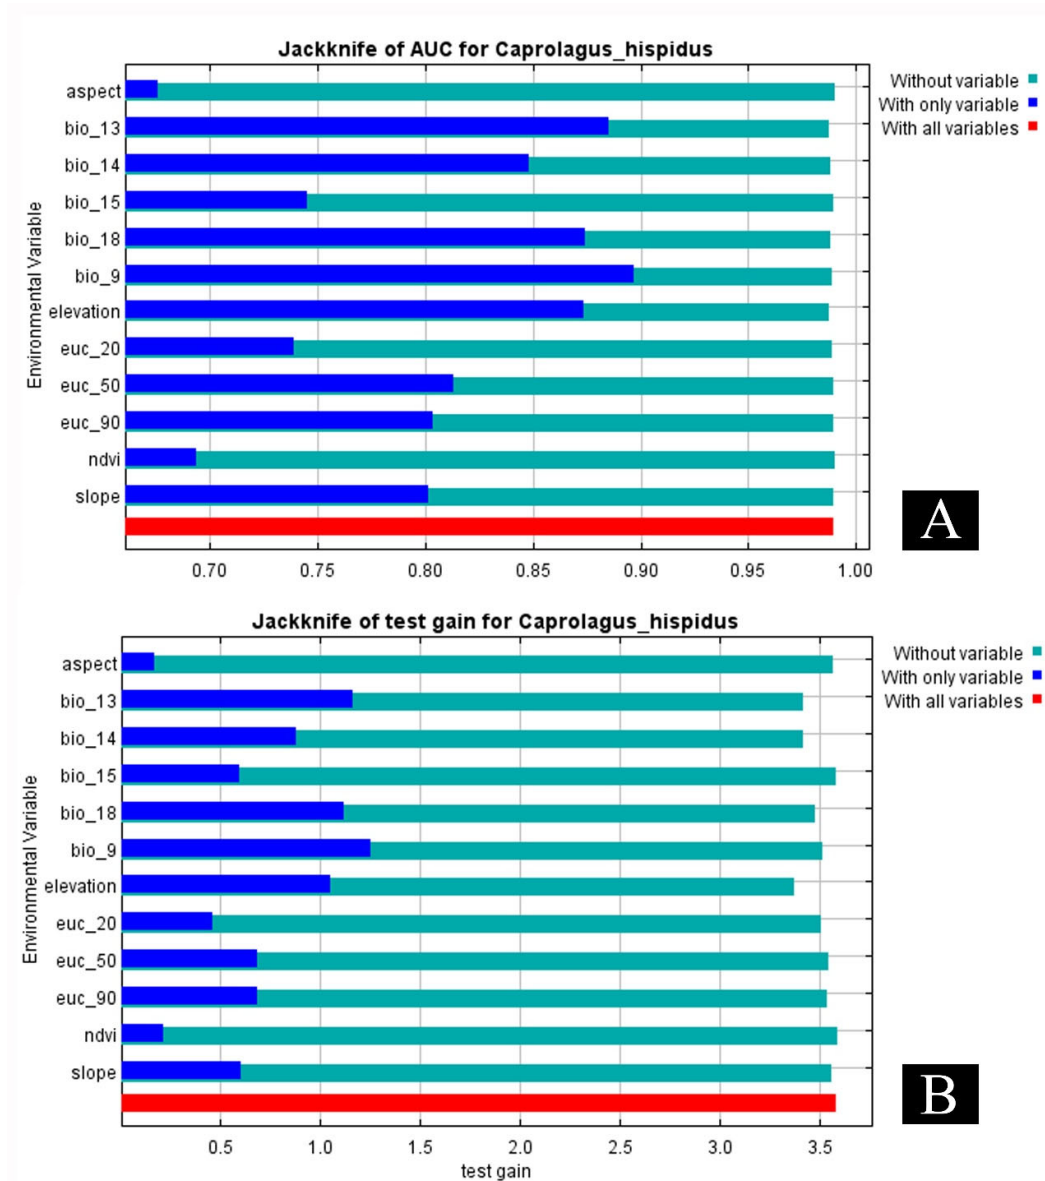

**Figure S3.** (A) The image shows the jackknife test, using AUC on test data. (B) The image shows the jackknife test of test gain.

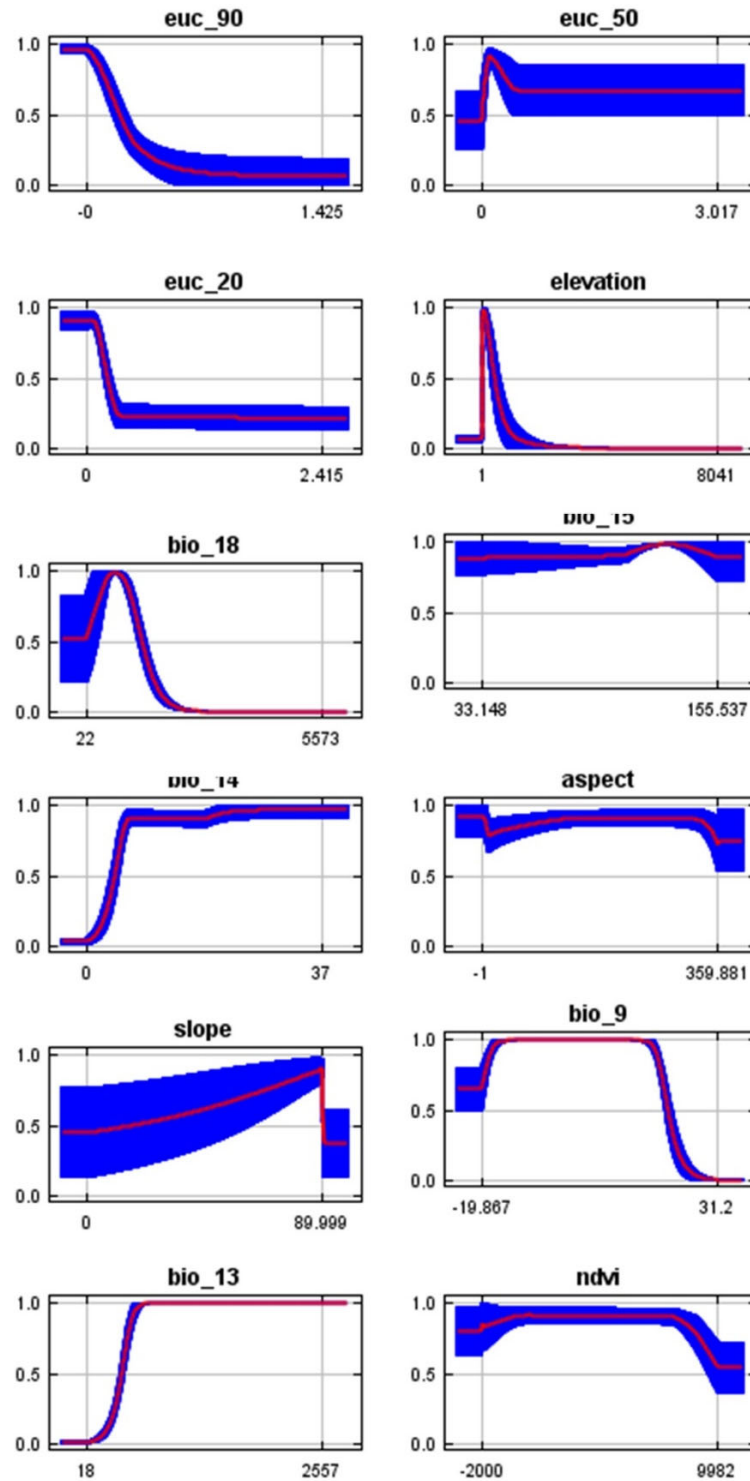

**Figure S4.** The curves show how each environmental variable affects the model prediction and how the predicted probability of presence changes as each environmental variable is varied, keeping all other environmental variables at their average sample value. It also shows the mean response of the 20 replicate MaxEnt runs (red) and the mean  $\pm$  one standard deviation (blue, two shades for categorical variables).

**Table S1.** Percentage contribution and permutation contribution with covariates details.

| Variable                                                                                                                                                                                                   | Variable Code | Percent contribution | Permutation importance |
|------------------------------------------------------------------------------------------------------------------------------------------------------------------------------------------------------------|---------------|----------------------|------------------------|
| Precipitation of Warmest Quarter                                                                                                                                                                           | bio_18        | 28.4                 | 6.3                    |
| Slope                                                                                                                                                                                                      | slope         | 16.4                 | 1.7                    |
| Precipitation of Driest Month                                                                                                                                                                              | bio_14        | 11.6                 | 7.9                    |
| Elevation                                                                                                                                                                                                  | elevation     | 9.4                  | 45.6                   |
| Euclidean Distance to Herbaceous wetland (Lands with a permanent mixture of water and herbaceous or woody vegetation. The vegetation can be present in either salt, brackish, or fresh water)              | euc_90        | 7.6                  | 3                      |
| Precipitation of Wettest Month                                                                                                                                                                             | bio_13        | 6.8                  | 13.6                   |
| Precipitation Seasonality (Coefficient of Variation)                                                                                                                                                       | bio_15        | 5.9                  | 0.6                    |
| Euclidean Distance to Urban/built up (Land covered by buildings and other man-made structures)                                                                                                             | euc_50        | 5.6                  | 1.2                    |
| Euclidean distance to Shrubs (woody perennial plants with persistent and woody stems and without any defined main stem being less than 5 m tall. The shrub foliage can be either evergreen or deciduous. ) | euc_20        | 4.5                  | 2.3                    |
| Mean Temperature of Driest Quarter                                                                                                                                                                         | bio_9         | 1.6                  | 17.5                   |
| Aspect                                                                                                                                                                                                     | aspect        | 1.3                  | 0.3                    |
| Normalized difference vegetation index                                                                                                                                                                     | ndvi          | 0.9                  | 0.1                    |

**Table S2.** Estimated suitable habitat (in km<sup>2</sup>) in different climate change scenarios.

| Scenarios           | Area (In sq. km.) |
|---------------------|-------------------|
| Present             | 11374             |
| SSP 126 (2041-2060) | 10620             |
| SSP 126 (2061-2080) | 9969              |
| SSP 245 (2041-2060) | 10440             |
| SSP 245 (2061-2080) | 5457              |
| SSP 585 (2041-2060) | 8242              |
| SSP 585 (2061-2080) | 4291              |

**Table S3.** Protected Areas in the distribution range of *C. hispidus*, out of which top 20 are demonstrated in Table 1. NP: National Park; WLS: Wildlife Sanctuary.

| Sl. No. | Country | State/Province    | NAME                         | Mean Suitability (Present) |
|---------|---------|-------------------|------------------------------|----------------------------|
| 1       | Nepal   | Mahakali Province | Shuklaphanta NP              | 0.837                      |
| 2       | India   | Assam             | Dibru-Saikhowa NP            | 0.631                      |
| 3       | India   | Assam             | Orang NP                     | 0.572                      |
| 4       | India   | Uttarakhand       | Corbett NP                   | 0.530                      |
| 5       | India   | Arunachal Pradesh | D'Ering Memorial WLS         | 0.477                      |
| 6       | India   | Uttar Pradesh     | Dudhwa NP                    | 0.464                      |
| 7       | India   | Assam             | Kaziranga NP                 | 0.463                      |
| 8       | Nepal   | Bagmati Province  | Chitawan NP                  | 0.446                      |
| 9       | India   | Assam             | Burachapori WLS              | 0.437                      |
| 10      | India   | Uttarakhand       | Sonanadi WLS                 | 0.423                      |
| 11      | Nepal   | Lumbini Province  | Bardia NP                    | 0.384                      |
| 12      | India   | Assam             | Nameri NP                    | 0.376                      |
| 13      | India   | Assam             | Laokhowa WLS                 | 0.329                      |
| 14      | India   | Assam             | Pani-Dihing WLS              | 0.318                      |
| 15      | India   | Assam             | Sonai-Rupai WLS              | 0.266                      |
| 16      | India   | Assam             | Manas NP                     | 0.245                      |
| 17      | India   | Bihar             | Valmiki NP                   | 0.216                      |
| 18      | India   | Uttar Pradesh     | Katerniaghat WLS             | 0.192                      |
| 19      | India   | Uttar Pradesh     | Kishanpur WLS                | 0.108                      |
| 20      | India   | Assam             | Borail WLS                   | 0.103                      |
| 21      | India   | Assam             | Bherjan-Borajan-Podumoni WLS | 0.086                      |
| 22      | India   | Assam             | Gibbon WLS                   | 0.077                      |
| 23      | India   | Uttar Pradesh     | Sohelwa WLS                  | 0.069                      |
| 24      | India   | Arunachal Pradesh | Kane WLS                     | 0.048                      |
| 25      | India   | Arunachal Pradesh | Sessa Orchid WLS             | 0.043                      |
| 26      | India   | Arunachal Pradesh | Pakhui WLS                   | 0.043                      |
| 27      | India   | Assam             | Chakrashila WLS              | 0.043                      |
| 28      | India   | Uttar Pradesh     | Sohagibarwa WLS              | 0.034                      |
| 29      | India   | Uttar Pradesh     | Bakhira WLS                  | 0.031                      |
| 30      | Bhutan  | -                 | Royal Manas NP               | 0.030                      |
| 31      | India   | West Bengal       | Buxa NP                      | 0.019                      |
| 32      | India   | Uttarakhand       | Binsar WLS                   | 0.017                      |
| 33      | India   | West Bengal       | Jaldapara WLS                | 0.016                      |
| 34      | India   | Assam             | Nambor Doigrung WLS          | 0.015                      |
| 35      | India   | Arunachal Pradesh | Namdapha NP                  | 0.014                      |
| 36      | India   | West Bengal       | Gorumara NP                  | 0.009                      |
| 37      | India   | Arunachal Pradesh | Mehao WLS                    | 0.007                      |
| 38      | India   | West Bengal       | Sunderban NP                 | 0.007                      |
| 39      | India   | Arunachal Pradesh | Mouling NP                   | 0.005                      |
| 40      | India   | Uttarakhand       | Kedarnath WLS                | 0.005                      |
| 41      | India   | Arunachal Pradesh | Kamlang WLS                  | 0.005                      |
| 42      | India   | Bihar             | Gautam buddha WLS            | 0.003                      |
| 43      | India   | West Bengal       | Ballavpur WLS                | 0.003                      |
| 44      | India   | Bihar             | Barela S.A.Z.S. WLS          | 0.003                      |
| 45      | India   | West Bengal       | Narendrapur WLS              | 0.003                      |

|    |       |                   |                           |       |
|----|-------|-------------------|---------------------------|-------|
| 46 | India | West Bengal       | Chapramari WLS            | 0.002 |
| 47 | India | West Bengal       | Mahananda WLS             | 0.002 |
| 48 | India | Arunachal Pradesh | Itanagar WLS              | 0.002 |
| 49 | India | Arunachal Pradesh | Tale Valley WLS           | 0.001 |
| 50 | India | Bihar             | Nagi Dam WLS              | 0.001 |
| 51 | India | Bihar             | Bhimbandh WLS             | 0.001 |
| 52 | India | West Bengal       | Neora Valley NP           | 0.001 |
| 53 | India | Uttarakhand       | Nanda Devi NP             | 0.001 |
| 54 | India | West Bengal       | Senchal WLS               | 0.001 |
| 55 | India | West Bengal       | Lothian Island WLS        | 0.000 |
| 56 | India | Uttarakhand       | Valley of Flowers NP      | 0.000 |
| 57 | India | Bihar             | Vikramshila Ganges WLS    | 0.000 |
| 58 | India | Arunachal Pradesh | Eagle Nest WLS            | 0.000 |
| 59 | India | Arunachal Pradesh | Yordi-Rabe Supe           | 0.000 |
| 60 | India | West Bengal       | Jorepokhri Salamander WLS | 0.000 |
| 61 | India | Uttar Pradesh     | Sandi WLS                 | 0.000 |
| 62 | India | Uttar Pradesh     | Surha Tal WLS             | 0.000 |
| 63 | India | Bihar             | Rajgir pant WLS           | 0.000 |
| 64 | India | West Bengal       | Raiganj WLS               | 0.000 |
| 65 | India | Uttar Pradesh     | Turtle WLS                | 0.000 |
| 66 | India | Bihar             | Kanwarjheel WLS           | 0.000 |
| 67 | India | Uttar Pradesh     | National Chambal WLS      | 0.000 |
| 68 | India | Uttar Pradesh     | Parvati Aranga WLS        | 0.000 |
| 69 | India | Arunachal Pradesh | Dibang WLS                | 0.000 |
| 70 | India | Uttar Pradesh     | Lakh Bahosi WLS           | 0.000 |
| 71 | India | West Bengal       | Singalila NP              | 0.000 |
| 72 | India | Bihar             | Kaimur WLS                | 0.000 |
| 73 | India | Uttar Pradesh     | Chandraprabha WLS         | 0.000 |
| 74 | India | Uttar Pradesh     | Samaspur WLS              | 0.000 |
| 75 | India | Uttar Pradesh     | Kaimur WLS                | 0.000 |
| 76 | India | Uttar Pradesh     | Nawabganj WLS             | 0.000 |
| 77 | India | West Bengal       | Bethuadahari WLS          | 0.000 |
| 78 | India | Uttarakhand       | Gangotri NP               | 0.000 |
| 79 | India | Uttar Pradesh     | Saman WLS                 | 0.000 |
| 80 | India | Uttar Pradesh     | Ranipur WLS               | 0.000 |
| 81 | India | Uttarakhand       | Govind NP                 | 0.000 |
| 82 | India | Uttar Pradesh     | Vijai Sagar WLS           | 0.000 |
